# Supplementary material for: Drivers of Antimicrobial Use Practices among Tennessee Dairy Cattle Producers
Source: Vet Med Int. 2018 Dec 27;2018:1836836. doi: 10.1155/2018/1836836 (PMC6327273; doi:10.1155/2018/1836836)
Supplement: Supplementary 4 — S4: Survey raw data. [file 1836836.f4.xlsx]

## Sheet: Antibiotic use practices of cat
Q3	Q3_3_TEXT	Q4	Q5	Q6	Q7	Q8	Q9	Q10	Q10_5_TEXT	Q11	Q12	Q12_5_TEXT	Q13	Q14	Q15	Q16	Q17	Q18	Q19	Q19_4_TEXT	Q20	Q21	Q22	Q23	Q24	Q25	Q25_4_TEXT	Q26_1	Q26_2	Q26_3	Q26_4	Q26_5	Q26_6	Q26_7	Q26_8	Q26_9	Q26_10	Q26_11	Q26_12	Q26_13	Q27_1	Q27_2	Q27_3	Q27_4	Q27_5	Q27_6	Q27_7	Q27_8	Q27_9
Which of the following best describes your primary cattle production? - Selected Choice	Which of the following best describes your primary cattle production? - Other (specify) - Text	How are antibiotic-treated cows distinguished from the rest of the milking herd at milking?	When are antibiotic-treated cows milked?	Are cows routinely screened after freshening for antibiotics with an antibiotic residue detection test?	Were there any antibiotic residue violations in your milk in the past 6 months?	To what extent do you agree or disagree with the following statement? " If all dairy producers in Tennessee followed best practices in the use of antibiotics, overall use of antibiotics in Tennessee dairy cattle would decrease".	To what extent do you agree or disagree with the following statement? " If all dairy producers in Tennessee followed best milk quality practices, overall use of antibiotics in Tennessee dairy cattle would decrease".	Which of the following best describes your beef production system? (check all that apply). - Selected Choice	Which of the following best describes your beef production system? (check all that apply). - Other (specify) - Text	Do you think there is over-use of antibiotics in beef production?	In which of the following beef production systems, are antibiotics used most? - Selected Choice	In which of the following beef production systems, are antibiotics used most? - Other (specify) - Text	Were there any antibiotic residue violations in beef (meat products) from cattle raised on your farm last year?	To what extent do you agree or disagree with the following statement? " If all beef producers followed best practices in the use of antibiotics, overall use of antibiotics in Tennessee beef cattle would decrease".	To what extent do you agree or disagree with the following statement? " If all beef producers followed best practices in the management of their herds, overall use of antibiotics in Tennessee beef cattle would decrease".	How familiar are you with the Veterinary Feed Directive (VFD)?	What is your opinion about the Veterinary Feed Directive (VFD)?	Were you aware of the Veterinary Feed Directive (VFD) before its implementation?	How has the Veterinary Feed Directive (VFD), from the time it became effective, influenced your use of veterinary services? - Selected Choice	How has the Veterinary Feed Directive (VFD), from the time it became effective, influenced your use of veterinary services? - Other (specify) - Text	Antibiotic resistance is the ability of bacteria (disease causing germs) to resist or be unaffected by the effects of medication. How familiar are you with the subject of antibiotic resistance?	How do you rate your degree of concern about antibiotic-resistant infections in cattle production?	How often do you observe antibiotic drug withdrawal times in your farm?	How often do you use bacterial culture to determine the cause of disease on your farm?	How often do you use bacterial culture to select the most appropriate antibiotics to use on your farm?	Who makes the laboratory request for bacterial culture testing for your farm? - Selected Choice	Who makes the laboratory request for bacterial culture testing for your farm? - Other (specify) - Text	Thinking about your practices BEFORE the Veterinary Feed Directive-final rule became effective on January 1, 2017, how important were the following factors in determining the choice of antibiotics used in your farm? - Recommendations from other producers	Thinking about your practices BEFORE the Veterinary Feed Directive-final rule became effective on January 1, 2017, how important were the following factors in determining the choice of antibiotics used in your farm? - Clinical signs and symptoms	Thinking about your practices BEFORE the Veterinary Feed Directive-final rule became effective on January 1, 2017, how important were the following factors in determining the choice of antibiotics used in your farm? - Cost of the antibiotic	Thinking about your practices BEFORE the Veterinary Feed Directive-final rule became effective on January 1, 2017, how important were the following factors in determining the choice of antibiotics used in your farm? - Veterinarian's prescription	Thinking about your practices BEFORE the Veterinary Feed Directive-final rule became effective on January 1, 2017, how important were the following factors in determining the choice of antibiotics used in your farm? - Positive culture and susceptibility tests	Thinking about your practices BEFORE the Veterinary Feed Directive-final rule became effective on January 1, 2017, how important were the following factors in determining the choice of antibiotics used in your farm? - Your farming experience	Thinking about your practices BEFORE the Veterinary Feed Directive-final rule became effective on January 1, 2017, how important were the following factors in determining the choice of antibiotics used in your farm? - Drug withdrawal times	Thinking about your practices BEFORE the Veterinary Feed Directive-final rule became effective on January 1, 2017, how important were the following factors in determining the choice of antibiotics used in your farm? - Recommendations from pharmaceutical company representatives	Thinking about your practices BEFORE the Veterinary Feed Directive-final rule became effective on January 1, 2017, how important were the following factors in determining the choice of antibiotics used in your farm? - Recommendations from feed mill operatives	Thinking about your practices BEFORE the Veterinary Feed Directive-final rule became effective on January 1, 2017, how important were the following factors in determining the choice of antibiotics used in your farm? - Availability of antibiotic(s)	Thinking about your practices BEFORE the Veterinary Feed Directive-final rule became effective on January 1, 2017, how important were the following factors in determining the choice of antibiotics used in your farm? - The ability of the drug to cure the infections	Thinking about your practices BEFORE the Veterinary Feed Directive-final rule became effective on January 1, 2017, how important were the following factors in determining the choice of antibiotics used in your farm? - Concerns for animal welfare	Thinking about your practices BEFORE the Veterinary Feed Directive-final rule became effective on January 1, 2017, how important were the following factors in determining the choice of antibiotics used in your farm? - Concerns for food security	Thinking about your practices AFTER the Veterinary Feed Directive-final rule became effective on January 1, 2017, how important are the following factors in determining the choice of antibiotics used in your farm? - Recommendations from other producers	Thinking about your practices AFTER the Veterinary Feed Directive-final rule became effective on January 1, 2017, how important are the following factors in determining the choice of antibiotics used in your farm? - Clinical signs and symptoms	Thinking about your practices AFTER the Veterinary Feed Directive-final rule became effective on January 1, 2017, how important are the following factors in determining the choice of antibiotics used in your farm? - Cost of the antibiotic	Thinking about your practices AFTER the Veterinary Feed Directive-final rule became effective on January 1, 2017, how important are the following factors in determining the choice of antibiotics used in your farm? - Veterinarian's prescription	Thinking about your practices AFTER the Veterinary Feed Directive-final rule became effective on January 1, 2017, how important are the following factors in determining the choice of antibiotics used in your farm? - Positive culture and susceptibility tests	Thinking about your practices AFTER the Veterinary Feed Directive-final rule became effective on January 1, 2017, how important are the following factors in determining the choice of antibiotics used in your farm? - Your farming experience	Thinking about your practices AFTER the Veterinary Feed Directive-final rule became effective on January 1, 2017, how important are the following factors in determining the choice of antibiotics used in your farm? - Drug withdrawal times	Thinking about your practices AFTER the Veterinary Feed Directive-final rule became effective on January 1, 2017, how important are the following factors in determining the choice of antibiotics used in your farm? - Recommendations from pharmaceutical company representatives	Thinking about your practices AFTER the Veterinary Feed Directive-final rule became effective on January 1, 2017, how important are the following factors in determining the choice of antibiotics used in your farm? - Recommendations from feed mill operatives
{"ImportId":"QID1"}	{"ImportId":"QID1_3_TEXT"}	{"ImportId":"QID46"}	{"ImportId":"QID47"}	{"ImportId":"QID39"}	{"ImportId":"QID40"}	{"ImportId":"QID52"}	{"ImportId":"QID65"}	{"ImportId":"QID10"}	{"ImportId":"QID10_5_TEXT"}	{"ImportId":"QID58"}	{"ImportId":"QID38"}	{"ImportId":"QID38_5_TEXT"}	{"ImportId":"QID41"}	{"ImportId":"QID51"}	{"ImportId":"QID66"}	{"ImportId":"QID6"}	{"ImportId":"QID23"}	{"ImportId":"QID60"}	{"ImportId":"QID67"}	{"ImportId":"QID67_4_TEXT"}	{"ImportId":"QID7"}	{"ImportId":"QID8"}	{"ImportId":"QID9"}	{"ImportId":"QID11"}	{"ImportId":"QID12"}	{"ImportId":"QID54"}	{"ImportId":"QID54_4_TEXT"}	{"ImportId":"QID13_1"}	{"ImportId":"QID13_2"}	{"ImportId":"QID13_3"}	{"ImportId":"QID13_4"}	{"ImportId":"QID13_5"}	{"ImportId":"QID13_6"}	{"ImportId":"QID13_7"}	{"ImportId":"QID13_8"}	{"ImportId":"QID13_9"}	{"ImportId":"QID13_10"}	{"ImportId":"QID13_11"}	{"ImportId":"QID13_12"}	{"ImportId":"QID13_13"}	{"ImportId":"QID57_1"}	{"ImportId":"QID57_2"}	{"ImportId":"QID57_3"}	{"ImportId":"QID57_4"}	{"ImportId":"QID57_5"}	{"ImportId":"QID57_6"}	{"ImportId":"QID57_7"}	{"ImportId":"QID57_8"}	{"ImportId":"QID57_9"}
Dairy production		All cows are milked using the same milking unit	Milked last	Yes	No	Agree	Agree									Very familiar	VFD is somewhat useful	Yes	VFD has caused me to seek veterinarian services more frequently		Very familiar	Moderately concerned	Always	Most of the time	Most of the time	The producer		Very important	Very important	Very important	Very important	Very important	Very important	Very important	Moderately important	Moderately important	Very important	Very important	Very important	Very important	Moderately important	Very important	Very important	Extremely important	Very important	Very important	Very important	Moderately important	Moderately important
Dairy production		All cows are milked using the same milking unit	Milked last	Yes	No	Agree	Disagree									Moderately familiar	VFD is not useful	No	VFD has not influenced me to seek veterinarian services		Very familiar	Moderately concerned	Always	Sometimes	Sometimes	The manager		Moderately important	Very important	Moderately important	Very important	Slightly important	Extremely important	Moderately important	Moderately important	Slightly important	Extremely important	Extremely important	Extremely important	Extremely important	Very important	Extremely important	Moderately important	Extremely important	Extremely important	Extremely important	Moderately important	Moderately important	Slightly important
Dairy production		All cows are milked using the same milking unit	Milked in-between	No	No	Neither agree nor disagree	Neither agree nor disagree									Moderately familiar	VFD is not useful	Yes	VFD has caused me to seek veterinarian services more frequently		Very familiar	Moderately concerned	Always	Most of the time	Most of the time	The producer		Very important	Very important	Moderately important	Moderately important	Extremely important	Slightly important	Extremely important	Slightly important	Slightly important	Very important	Extremely important	Very important	Very important	Extremely important	Very important	Moderately important	Moderately important	Extremely important	Slightly important	Extremely important	Slightly important	Slightly important
Dairy production		All cows are milked using the same milking unit	Milked last	No	No	Disagree	Disagree									Moderately familiar	VFD is neither useful nor beneficial	Yes	VFD has not influenced me to seek veterinarian services		Moderately familiar	Moderately concerned	Always	Sometimes	Sometimes	The veterinarian		Slightly important	Slightly important	Not at all important	Slightly important	Slightly important	Very important	Slightly important	Very important	Moderately important	Very important	Very important	Very important	Very important	Slightly important	Slightly important	Not at all important	Moderately important	Slightly important	Extremely important	Extremely important	Very important	Very important
Dairy production		All cows are milked using the same milking unit	Milked last	Yes	No	Disagree	Agree									Very familiar	VFD is somewhat useful	Yes	VFD has not influenced me to seek veterinarian services		Moderately familiar	Moderately concerned	Always	About half the time	Most of the time	The producer		Moderately important	Very important	Very important	Very important	Very important	Very important	Very important	Moderately important	Not at all important	Very important	Very important	Very important	Very important
Dairy production		All cows are milked using the same milking unit	Milked in-between	Yes	No	Neither agree nor disagree	Neither agree nor disagree									Moderately familiar	I am not familiar with VFD	Not sure	VFD has not influenced me to seek veterinarian services		Slightly familiar	I am not familiar about antibiotic-resistant infections in cattle production	Always	Sometimes	Sometimes	The veterinarian		Moderately important	Moderately important	Moderately important	Moderately important	Moderately important	Moderately important	Moderately important	Moderately important	Moderately important	Moderately important	Moderately important	Moderately important	Moderately important	Not at all important	Not at all important	Not at all important	Not at all important	Not at all important	Not at all important	Not at all important	Not at all important	Not at all important
Dairy production		Milked with a separate milking unit	Milked last	No	No	Agree	Agree									Moderately familiar	VFD is not useful	Not sure	VFD has not influenced me to seek veterinarian services		Very familiar	Not concerned	Always	Most of the time	Most of the time			Very important	Very important	Moderately important	Slightly important	Very important	Very important	Very important	Slightly important	Slightly important	Very important	Very important	Very important	Very important	Very important	Very important	Slightly important	Slightly important	Very important	Very important	Very important	Slightly important	Slightly important
Dairy production		All cows are milked using the same milking unit	Milked in-between	Yes	No	Neither agree nor disagree	Agree									Slightly familiar	I am not familiar with VFD	Not sure	VFD has not influenced me to seek veterinarian services		Moderately familiar	Moderately concerned	Always	Sometimes	Sometimes	The veterinarian		Moderately important	Very important	Moderately important	Extremely important	Extremely important	Slightly important	Moderately important	Slightly important	Moderately important	Very important	Extremely important	Extremely important	Extremely important	Very important	Very important	Moderately important	Very important	Extremely important	Moderately important	Moderately important	Slightly important	Moderately important
Dairy production		Milked with a separate milking unit	Milked last	No	No	Agree	Agree									Very familiar	VFD is neither useful nor beneficial	Yes	VFD has caused me to seek veterinarian services more frequently		Moderately familiar	Moderately concerned	Always	Sometimes	Sometimes	The manager		Moderately important	Very important	Moderately important	Very important	Slightly important	Moderately important	Moderately important	Slightly important	Not at all important	Moderately important	Very important	Moderately important	Slightly important	Moderately important	Very important	Moderately important	Very important	Slightly important	Very important	Very important	Slightly important	Not at all important
Dairy production		All cows are milked using the same milking unit	Milked last	No	No	Disagree	disagree									Very familiar	VFD is neither useful nor beneficial	Yes	VFD has caused me to seek veterinarian services more frequently		Extremely familiar	Moderately concerned	Always	Sometimes	Sometimes	The veterinarian		Moderately important	Very important	Slightly important	Very important	Very important	Very important	Very important	Moderately important	Moderately important	Slightly important	Extremely important	Slightly important	Slightly important	Moderately important	Slightly important	Moderately important	Extremely important	Extremely important	Moderately important	Moderately important	Moderately important	Moderately important
Dairy production (some beef)		All cows are milked using the same milking unit	Milked in-between	No	No	Disagree	Agree									Moderately familiar	VFD is neither useful nor beneficial	Yes	VFD has not influenced me to seek veterinarian services		Very familiar	Moderately concerned	Always	Never	Never			Moderately important	Very important	Slightly important	Very important	Not at all important	Very important	Very important	Moderately important	Moderately important	Very important	Very important	Very important	Very important	Very important	Moderately important	Slightly important	Very important	Not at all important	Very important	Very important	Moderately important	Moderately important
Dairy production		All cows are milked using the same milking unit	Milked last	Yes	No	Neither agree nor disagree	Agree									Moderately familiar	VFD is somewhat useful	Yes	VFD has not influenced me to seek veterinarian services		Very familiar	Very concerned	Always	About half of the time	Sometimes	The producer		Slightly important	Very important	Moderately important	Extremely important	Extremely important	Very important	Moderately important	Moderately important	Slightly important	Moderately important	Extremely important	Extremely important	Extremely important	Slightly important	Extremely important	Moderately important	Extremely important	Extremely important	Moderately important			Slightly important
Other (specify)	Cow calf operation	Milked with a separate milking unit	Milked last	Yes	No	Disagree	Strongly disagree	Cow-calf production		No	Cow-calf production		No	Strongly disagree	Strongly disagree	Very familiar	VFD is very useful	Yes	VFD has reduced my use of veterinarian services		Moderately familiar	Very concerned	Always	Sometimes	Always	The manager		Moderately important	Very important	Not at all important	Extremely important	Extremely important	Very important	Extremely important	Extremely important	Moderately important	Extremely important	Extremely important	Extremely important	Extremely important	Moderately important	Extremely important	Extremely important	Extremely important	Extremely important	Very important	Extremely important	Extremely important	Moderately important
Dairy production		All cows are milked using the same milking unit	Milked in-between	No	No	Neither agree nor disagree	Neither agree nor disagree									Slightly familiar	VFD is somewhat useful	Yes	VFD has not influenced me to seek veterinarian services		Very familiar	Moderately concerned	Always	Sometimes	Sometimes	The producer,The veterinarian		Slightly important	Extremely important	Slightly important	Moderately important	Extremely important	Extremely important	Not at all important	Slightly important	Not at all important	Very important	Extremely important	Extremely important	Extremely important	Slightly important	Extremely important	Slightly important	Moderately important	Extremely important	Extremely important	Not at all important	Slightly important	Not at all important
Dairy production		All cows are milked using the same milking unit	Milked last	Yes	No	Agree	Neither agree nor disagree									Slightly familiar	VFD is somewhat useful	Yes	VFD has reduced my use of veterinarian services		Moderately familiar	Moderately concerned	Always	Sometimes	Sometimes	The veterinarian		Slightly important	Moderately important	Slightly important	Moderately important	Moderately important	Moderately important		Slightly important	Slightly important	Moderately important	Very important	Moderately important	Very important
Dairy production		All cows are milked using the same milking unit	Milked last	No	No	Disagree	Agree									Not familiar at all	I am not familiar with VFD	No	VFD has not influenced me to seek veterinarian services		Slightly familiar	Moderately concerned	Always	Never	Sometimes	The veterinarian		Not at all important	Very important	Moderately important	Extremely important	Very important	Not at all important	Slightly important	Slightly important	Slightly important	Moderately important	Very important	Very important	Extremely important
Beef production,Dairy production		Milked with a separate milking unit	Milked in-between	Yes	No	Agree	Disagree	Cow-calf production		No	Backgrounding-stocking		No	Disagree	Disagree	Very familiar	VFD is not useful	Yes	VFD has not influenced me to seek veterinarian services		Moderately familiar	Not concerned	Sometimes	Sometimes	About half the time	The producer		Slightly important	Slightly important	Moderately important	Slightly important	Slightly important	Slightly important	Slightly important	Very important	Moderately important	Slightly important	Moderately important	Extremely important	Very important	Slightly important	Slightly important	Moderately important	Slightly important		Not at all important	Moderately important	Moderately important	Very important
Beef production,Dairy production		All cows are milked using the same milking unit	Milked in-between	Yes	No	Agree	Disagree	Cow-calf production		No	Backgrounding-stocking		No	Agree	Agree	Very familiar	VFD is not useful	No	VFD has not influenced me to seek veterinarian services		Not familiar at all	Not concerned	Always	Sometimes	Sometimes	The veterinarian
Dairy production		Milked with a separate milking unit	Milked in-between	No	No	Neither agree nor disagree	Neither agree nor disagree									Moderately familiar	VFD is neither useful nor beneficial	Yes	VFD has caused me to seek veterinarian services more frequently		Moderately familiar	Moderately concerned	Always	About half of the time	About half the time	The veterinarian		Moderately important	Very important	Very important	Extremely important	Very important	Very important	Extremely important	Moderately important	Slightly important	Moderately important	Extremely important	Very important	Very important	Very important	Very important	Very important	Extremely important	Very important	Very important	Extremely important	Very important	Very important
Dairy production		All cows are milked using the same milking unit	Milked in-between	No	No	Neither agree nor disagree	Agree									Not familiar at all	I am not familiar with VFD	No	VFD has not influenced me to seek veterinarian services		Not familiar at all	Not concerned	Sometimes	Sometimes	Never			Very important	Extremely important	Extremely important	Moderately important	Moderately important	Extremely important	Extremely important	Moderately important	Slightly important	Moderately important	Extremely important	Extremely important	Extremely important	Very important	Very important	Extremely important	Very important	Moderately important	Extremely important	Extremely important	Slightly important	Slightly important
Dairy production		Milked with a separate milking unit	Milked in-between	No	Not sure	Strongly disagree	Strongly disagree									Not familiar at all	VFD is not useful	Yes	VFD has caused me to seek veterinarian services more frequently		Not familiar at all	I am not familiar about antibiotic-resistant infections in cattle production	Never	Never	Never			Not at all important		Slightly important	Slightly important	Slightly important	Slightly important	Slightly important	Slightly important	Slightly important	Slightly important	Slightly important	Slightly important	Slightly important	Slightly important	Slightly important	Slightly important	Slightly important	Slightly important	Slightly important	Slightly important	Slightly important	Slightly important
Dairy production		All cows are milked using the same milking unit	Milked last	Yes	No	Agree	Agree									Slightly familiar	VFD is neither useful nor beneficial	Yes	VFD has not influenced me to seek veterinarian services		Moderately familiar	Moderately concerned	Always	Sometimes	About half the time	The veterinarian		Moderately important	Moderately important	Moderately important	Moderately important	Moderately important	Moderately important	Moderately important	Moderately important	Moderately important	Moderately important	Moderately important	Moderately important	Moderately important	Moderately important	Moderately important	Moderately important	Moderately important	Moderately important	Moderately important	Moderately important	Moderately important	Moderately important
Dairy production		All cows are milked using the same milking unit	Milked in-between	No	No	Strongly disagree	Neither agree nor disagree									Moderately familiar	VFD is not useful	Yes	VFD has caused me to seek veterinarian services more frequently		Moderately familiar	Moderately concerned	Always	Sometimes	Sometimes	The manager		Slightly important	Extremely important	Very important	Very important	Very important	Very important	Very important	Moderately important	Slightly important	Very important	Extremely important	Extremely important	Extremely important	Slightly important	Extremely important	Extremely important	Very important	Extremely important	Extremely important	Extremely important	Slightly important	Slightly important
Dairy production		Milked with a separate milking unit	Milked last	Yes	No	Disagree	Disagree									Moderately familiar	VFD is neither useful nor beneficial	Yes	VFD has caused me to seek veterinarian services more frequently		Very familiar	Not concerned	Always	Never	Never			Not at all important	Very important	Moderately important	Extremely important	Not at all important	Extremely important	Extremely important	Not at all important	Not at all important	Not at all important	Extremely important	Extremely important	Extremely important	Not at all important	Very important	Moderately important	Extremely important	Not at all important	Extremely important	Extremely important	Not at all important	Not at all important
Dairy production		Milked with a separate milking unit	Milked last	Yes	No	Agree	Strongly agree									Not familiar at all	I am not familiar with VFD	No	VFD has reduced my use of veterinarian services		Very familiar	Moderately concerned	Always	Most of the time	Most of the time	The veterinarian		Very important	Very important	Extremely important	Extremely important	Moderately important	Extremely important	Extremely important	Moderately important	Slightly important		Extremely important	Extremely important	Extremely important	Moderately important	Very important	Extremely important	Extremely important	Very important	Extremely important	Extremely important	Slightly important	Slightly important
Dairy production		All cows are milked using the same milking unit	Milked last	No	No	Neither agree nor disagree	Neither agree nor disagree									Moderately familiar	VFD is neither useful nor beneficial	Yes	Other (specify)	Not changed	Moderately familiar	Not concerned	Sometimes	Sometimes	Never			Moderately important	Moderately important	Slightly important	Very important	Very important	Moderately important	Very important	Moderately important	Slightly important	Slightly important	Very important	Moderately important	Moderately important	Moderately important	Moderately important	Moderately important	Moderately important	Moderately important	Moderately important	Moderately important	Moderately important	Moderately important
Dairy production		All cows are milked using the same milking unit	Milked in-between	No	No	Agree	Agree									Moderately familiar	VFD is somewhat useful	No	VFD has not influenced me to seek veterinarian services		Very familiar	Very concerned	Always	Sometimes	Sometimes	The producer		Moderately important	Very important	Not at all important	Very important	Extremely important	Very important	Moderately important	Not at all important	Moderately important	Moderately important	Extremely important	Extremely important	Extremely important	Moderately important	Very important	Not at all important	Extremely important	Extremely important	Very important	Moderately important	Not at all important	Moderately important
Dairy production		All cows are milked using the same milking unit	Milked in-between	Not sure	Not sure	Neither agree nor disagree	Neither agree nor disagree									Slightly familiar	VFD is neither useful nor beneficial	Not sure	VFD has caused me to seek veterinarian services more frequently		Slightly familiar	Not concerned	Sometimes	Never	Never			Slightly important	Very important	Slightly important	Very important	Not at all important	Very important	Very important	Not at all important	Not at all important	Very important	Very important	Very important	Very important	Slightly important	Very important	Slightly important	Very important	Not at all important	Very important	Very important	Not at all important	Not at all important
Dairy production		All cows are milked using the same milking unit	Milked last	Yes	No	Agree	Strongly agree									Not familiar at all	I am not familiar with VFD	No			Slightly familiar	Moderately concerned	Always	Never	Never			Slightly important	Slightly important	Slightly important	Slightly important	Slightly important	Slightly important	Slightly important	Slightly important	Slightly important	Slightly important	Slightly important	Slightly important	Slightly important	Slightly important	Slightly important	Slightly important	Slightly important	Slightly important	Slightly important	Slightly important	Slightly important	Slightly important
Dairy production		All cows are milked using the same milking unit	Milked in-between	Yes	No	Strongly agree	Strongly agree									Moderately familiar	VFD is somewhat useful	No	Other (specify)	I was already using veterinarian services	Moderately familiar	Moderately concerned	Always	Never	Sometimes	The veterinarian		Moderately important	Very important	Very important	Extremely important	Extremely important	Moderately important	Moderately important	Not at all important	Not at all important	Very important	Extremely important	Extremely important	Extremely important	Moderately important	Moderately important	Very important	Extremely important	Extremely important	Very important	Extremely important	Extremely important	Not at all important
Dairy production		All cows are milked using the same milking unit	Milked last	No	No	Agree	Agree									Slightly familiar	VFD is not useful	Yes	VFD has caused me to seek veterinarian services more frequently		Slightly familiar	Moderately concerned	Most of the time	Most of the time	Sometimes	The veterinarian		Moderately important	Very important	Very important	Moderately important	Very important	Very important	Extremely important	Moderately important	Moderately important	Extremely important	Extremely important	Extremely important	Extremely important
Dairy production		All cows are milked using the same milking unit	Milked in-between	No	No	Agree	Agree									Slightly familiar	VFD is neither useful nor beneficial	Yes	VFD has not influenced me to seek veterinarian services		Moderately familiar	Very concerned	Always	Sometimes	Sometimes	The producer		Very important	Extremely important	Moderately important	Very important	Very important	Extremely important	Very important	Very important	Very important	Extremely important	Extremely important	Extremely important	Extremely important	Very important	Extremely important	Very important	Very important	Very important	Extremely important	Extremely important	Very important	Very important
Dairy production		All cows are milked using the same milking unit	Milked last	No	No	Agree	Agree									Moderately familiar	VFD is somewhat useful	Yes	VFD has not influenced me to seek veterinarian services		Moderately familiar	Moderately concerned	Always	Sometimes	Sometimes	The producer		Moderately important	Extremely important	Moderately important	Very important	Moderately important	Very important	Moderately important	Moderately important	Moderately important	Very important	Extremely important	Moderately important	Moderately important	Moderately important	Extremely important	Moderately important	Moderately important	Moderately important	Very important	Very important	Moderately important	Moderately important
Beef production,Dairy production		All cows are milked using the same milking unit	Milked in-between	Yes	No	Agree	Agree	Cow-calf production		No	Feedlot operations		No	Agree	Agree	Slightly familiar	VFD is not useful	Yes	VFD has not influenced me to seek veterinarian services		Slightly familiar	Not concerned	Always	Never	Never			Moderately important	Very important	Moderately important	Very important	Slightly important	Very important	Moderately important	Slightly important	Slightly important	Moderately important	Very important	Slightly important	Very important	Moderately important	Very important	Moderately important	Moderately important	Slightly important	Very important	Moderately important	Slightly important	Slightly important
Dairy production		All cows are milked using the same milking unit	Milked in-between	No	No	Neither agree nor disagree	Neither agree nor disagree
Dairy production		All cows are milked using the same milking unit	Milked in-between	No	No	Agree	Neither agree nor disagree									Moderately familiar	VFD is neither useful nor beneficial	Not sure	VFD has not influenced me to seek veterinarian services		Moderately familiar	Moderately concerned	Most of the time	Sometimes	Sometimes	The producer		Moderately important	Moderately important	Moderately important	Moderately important	Very important	Moderately important	Moderately important		Slightly important	Moderately important	Very important	Moderately important	Moderately important	Moderately important	Moderately important	Moderately important	Moderately important	Moderately important	Moderately important	Moderately important	Moderately important	Moderately important
Dairy production		All cows are milked using the same milking unit	Milked in-between	Yes	No	Agree	Agree									Very familiar	VFD is neither useful nor beneficial	Yes	VFD has caused me to seek veterinarian services more frequently		Moderately familiar	Moderately concerned	Always	Sometimes	Sometimes	The veterinarian		Very important	Extremely important	Very important	Extremely important	Moderately important	Extremely important	Extremely important	Very important	Very important	Extremely important	Extremely important	Extremely important	Extremely important	Extremely important	Extremely important	Extremely important	Extremely important	Extremely important	Extremely important	Extremely important	Extremely important	Extremely important
Beef production,Dairy production		All cows are milked using the same milking unit	Milked in-between	No	No	Agree	Agree	Cow-calf production		No	Feedlot operations		No	Disagree	Disagree	Not familiar at all	I am not familiar with VFD					Not concerned	Always	Sometimes
Dairy production		Milked with a separate milking unit	Milked last	Yes	No	Disagree	Disagree									Moderately familiar	VFD is neither useful nor beneficial	Yes	VFD has not influenced me to seek veterinarian services		Very familiar	Not concerned	Always	Sometimes	Sometimes	The veterinarian		Slightly important	Very important	Moderately important	Extremely important	Extremely important	Moderately important	Very important	Not at all important	Not at all important	Slightly important	Extremely important	Extremely important	Extremely important
Dairy production		Milked with a separate milking unit	Milked in-between	Yes	No	Neither agree nor disagree	Neither agree nor disagree									Moderately familiar	VFD is somewhat useful	Yes	VFD has not influenced me to seek veterinarian services		Moderately familiar	Moderately concerned	Always	About half the time	About half the time	The producer,The veterinarian		Not at all important	Moderately important	Very important	Very important	Very important	Very important	Extremely important	Not at all important	Not at all important	Slightly important	Very important	Very important	Very important	Not at all important	Moderately important	Moderately important	Very important	Very important	Very important	Extremely important	Not at all important	Not at all important
Dairy production		Milked with a separate milking unit	Milked last	No	Not sure	Neither agree nor disagree	Agree									Slightly familiar	VFD is somewhat useful	Yes	VFD has not influenced me to seek veterinarian services		Moderately familiar	Moderately concerned	Most of the time	Most of the time	Sometimes	The producer		Slightly important	Moderately important	Very important	Very important	Slightly important	Very important	Very important	Very important	Very important	Very important	Very important	Very important	Very important	Moderately important	Moderately important	Very important	Very important	Very important	Very important	Very important	Very important	Very important
Dairy production		Milked with a separate milking unit	Milked last	Yes	No	Agree	Agree									Slightly familiar	I am not familiar with VFD	No	VFD has reduced my use of veterinarian services		Moderately familiar	Moderately concerned	Always	Sometimes	Sometimes	The producer		Slightly important	Very important	Moderately important	Extremely important	Extremely important	Extremely important	Extremely important	Very important	Very important	Very important	Extremely important	Extremely important	Extremely important	Slightly important	Very important	Moderately important	Extremely important	Extremely important	Extremely important	Extremely important	Very important	Very important
Dairy production		Milked with a separate milking unit	Milked last	No	No	Agree	Agree									Very familiar	VFD is neither useful nor beneficial	Yes	VFD has caused me to seek veterinarian services more frequently		Very familiar	Moderately concerned	Always	Sometimes	Sometimes	The producer		Not at all important	Extremely important	Moderately important	Moderately important	Moderately important	Very important	Extremely important	Not at all important	Not at all important	Extremely important	Extremely important	Extremely important	Very important	Not at all important	Extremely important	Very important	Moderately important	Slightly important	Extremely important	Extremely important	Not at all important	Not at all important
Dairy production		Milked with a separate milking unit	Milked in-between	No	No	Neither agree nor disagree	Disagree									Slightly familiar	VFD is neither useful nor beneficial	No	VFD has caused me to seek veterinarian services more frequently		Moderately familiar	Moderately concerned	Always	Sometimes	Sometimes	The veterinarian		Slightly important	Very important	Not at all important	Very important	Very important	Slightly important	Not at all important	Not at all important	Not at all important	Slightly important	Very important	Very important	Very important	Slightly important	Very important	Not at all important	Very important	Very important	Moderately important	Not at all important	Not at all important	Not at all important
Dairy production		All cows are milked using the same milking unit	Milked in-between	No	No	Neither agree nor disagree	Neither agree nor disagree									Moderately familiar	VFD is neither useful nor beneficial	Yes	VFD has not influenced me to seek veterinarian services		Moderately familiar	I am not familiar about antibiotic-resistant infections in cattle production	Always	Sometimes	Sometimes	The veterinarian		Moderately important	Moderately important	Moderately important	Moderately important	Moderately important	Moderately important	Moderately important	Moderately important	Moderately important	Moderately important	Moderately important	Moderately important	Moderately important
[truncated: 68 more columns]
